# Supplementary material for: Psychopathology and Somatic Complaints: A Cross-Sectional Study with Portuguese Adults
Source: MDPI journal article supplement (doi:10.3390/healthcare9040478), 2021-04-17
Supplement: s1 [file s1]

**Table S1.** Sociodemographic and clinical characteristics.

| <b>Baseline characteristic</b>                       | General<br>Population<br>(n= 101)<br><b>M (SD)</b> | Clinical<br>Group<br>(n = 93)<br><b>M (SD)</b> |
|------------------------------------------------------|----------------------------------------------------|------------------------------------------------|
| Age                                                  | 37.8 (12.02)                                       | 53.9 (9.46)                                    |
| Educational level (years<br>of schooling)            | 14.05 (4.07)                                       | 9.44 (4.49)                                    |
|                                                      | <b>n (%)</b>                                       | <b>n (%)</b>                                   |
| Gender                                               |                                                    |                                                |
| Female                                               | 75 (74.3)                                          | 85 (91.4)                                      |
| Male                                                 | 26 (25.7)                                          | 8 (8.6)                                        |
| Marital status                                       |                                                    |                                                |
| Single                                               | 49 (48.5)                                          | 7 (7.5)                                        |
| Married/partnered                                    | 41 (40.6)                                          | 72 (77.4)                                      |
| Divorced                                             | 9 (8.9)                                            | 10 (10.8)                                      |
| Widowed                                              | 2 (2.0)                                            | 4 (4.3)                                        |
| Hospitalization<br>(previous 2 years) <sup>a b</sup> | 6 (6.7)                                            | 21 (22.6)                                      |
| Reason for<br>hospitalization <sup>a b</sup>         |                                                    |                                                |
| Clinical<br>assessment                               | 4 (4.4)                                            | 2 (2.1)                                        |
| Surgery                                              | 0                                                  | 13 (14)                                        |
| Accident                                             | 0                                                  | 2 (2.1)                                        |
| Pneumonia                                            | 0                                                  | 2 (2.1)                                        |
| Ischemic stroke                                      | 0                                                  | 1 (1.2)                                        |
| Suicidal ideation                                    | 0                                                  | 1 (1.2)                                        |
| Bacteria in the<br>brain                             | 1 (1.1)                                            | 0                                              |
| Most reported somatic<br>complaints                  |                                                    |                                                |
| Back pain                                            | 88 (87.1)                                          | 86 (92.5)                                      |
| Fatigue                                              | 63 (62.4)                                          | 93 (100)                                       |
| Pain in arms, legs,<br>or joints                     | 65 (64.6)                                          | 88 (94.6)                                      |
| Headaches                                            | 57 (56.4)                                          | 83 (89.2)                                      |
| Trouble sleeping                                     | 47 (46.5)                                          | 82 (88.2)                                      |
| Substance consumption <sup>a b</sup>                 |                                                    |                                                |
| Tobacco use                                          | 17 (18.9)                                          | 10 (10.8)                                      |
| Alcohol use                                          | 5 (5.5)                                            | 2 (2.2)                                        |
| Illegal drugs use                                    | 2 (2.2)                                            | 0                                              |

<sup>a</sup> Reflects the number and percentage of participants answering yes" to this question. <sup>b</sup> 11 missing data.

**Table S2.** Results of PCA: factor loadings of the 2-factor model and communalities

| Variable                      | Pattern Matrix |              | Structure Matrix |              | $h^2$ |
|-------------------------------|----------------|--------------|------------------|--------------|-------|
|                               | F1             | F2           | F1               | F2           |       |
| DASS-21 depression            | <b>0.875</b>   | 0.018        | <b>0.863</b>     | −0.571       | 0.744 |
| DASS-21 anxiety               | <b>0.698</b>   | −0.216       | <b>0.843</b>     | −0.686       | 0.737 |
| DASS-21 stress                | <b>0.881</b>   | −0.011       | <b>0.888</b>     | −0.604       | 0.789 |
| BSI somatization              | <b>0.465</b>   | −0.517       | <b>0.814</b>     | −0.831       | 0.808 |
| BSI obsession-compulsion      | <b>0.552</b>   | −0.428       | <b>0.841</b>     | −0.800       | 0.807 |
| BSI interpersonal sensitivity | <b>0.900</b>   | 0.031        | <b>0.879</b>     | −0.575       | 0.773 |
| BSI depression                | <b>0.892</b>   | −0.041       | <b>0.919</b>     | −0.641       | 0.846 |
| BSI hostility                 | <b>0.877</b>   | 0.107        | <b>0.805</b>     | −0.484       | 0.654 |
| BSI anxiety                   | <b>0.872</b>   | −0.012       | <b>0.881</b>     | −0.600       | 0.776 |
| BSI phobic anxiety            | <b>0.802</b>   | 0.058        | <b>0.763</b>     | −0.483       | 0.585 |
| BSI paranoid ideation         | <b>0.768</b>   | −0.111       | <b>0.843</b>     | −0.629       | 0.718 |
| BSI psychoticism              | <b>0.918</b>   | 0.046        | <b>0.887</b>     | −0.573       | 0.788 |
| SF-20 health perception       | −0.065         | <b>0.859</b> | −0.644           | <b>0.903</b> | 0.817 |
| SF-20 physical functioning    | 0.074          | <b>0.908</b> | −0.538           | <b>0.858</b> | 0.739 |
| SF-20 role functionality      | 0.039          | <b>0.953</b> | −0.603           | <b>0.927</b> | 0.860 |
| SF-20 social functioning      | −0.212         | <b>0.648</b> | −0.648           | <b>0.791</b> | 0.650 |
| SF-20 mental health           | −0.615         | <b>0.321</b> | −0.831           | <b>0.735</b> | 0.747 |

F1 – Psychopathology (67.64% of Variance); F2 – Health Conditions (7.87% of Variance)

Note: The extraction method was principal component analysis with an oblique (Direct Oblimin with Kaiser Normalization) rotation.

**Table S3.** Hierarchical linear regression of predictors of FSS severity, with 95% confidence interval.

|                   | General Population                         |       |           | Clinical Group                             |       |          |
|-------------------|--------------------------------------------|-------|-----------|--------------------------------------------|-------|----------|
|                   | B                                          | SE B  | $\beta$   | B                                          | SE B  | $\beta$  |
| <b>Step 1</b>     |                                            |       |           |                                            |       |          |
| Constant          | 7.229                                      | 0.465 |           | 16.212                                     | 0.526 |          |
| Gender            | -3.451                                     | 1.027 | -0.341*** | -0.837                                     | 1.794 | -0.049   |
|                   | R <sup>2</sup> = 0.116 ( <i>p</i> = 0.001) |       |           | R <sup>2</sup> = 0.002 ( <i>p</i> = 0.642) |       |          |
| <b>Step 2</b>     |                                            |       |           |                                            |       |          |
| Constant          | 6.995                                      | 1.470 |           | 14.269                                     | 2.936 |          |
| Gender            | -3.428                                     | 1.042 | -0.338*** | -0.879                                     | 1.801 | -0.051   |
| Age               | 0.006                                      | 0.037 | 0.017     | 0.036                                      | 0.054 | 0.071    |
|                   | $\Delta R^2 = 0.000$ ( <i>p</i> = 0.867);  |       |           | $\Delta R^2 = 0.005$ ( <i>p</i> = 0.503)   |       |          |
| <b>Step 3</b>     |                                            |       |           |                                            |       |          |
| Constant          | 13.129                                     | 2.572 |           | 17.226                                     | 3.506 |          |
| Gender            | -4.018                                     | 1.022 | -0.397*** | -0.718                                     | 1.791 | -0.042   |
| Age               | -0.041                                     | 0.039 | -0.114    | 0.012                                      | 0.056 | 0.024    |
| Educational level | -0.304                                     | 0.107 | -0.311**  | -0.178                                     | 0.117 | -0.165   |
|                   | $\Delta R^2 = .078$ ( <i>p</i> = .005)     |       |           | $\Delta R^2 = .025$ ( <i>p</i> = .133)     |       |          |
| <b>Step 4</b>     |                                            |       |           |                                            |       |          |
| Constant          | 13.397                                     | 2.478 |           | 12.622                                     | 3.240 |          |
| Gender            | -3.550                                     | 0.999 | -0.350*** | -2.003                                     | 1.608 | -0.117   |
| Age               | -0.050                                     | 0.038 | -0.138    | 0.009                                      | 0.049 | 0.018    |
| Educational level | -0.338                                     | 0.103 | -0.346**  | -0.137                                     | 0.104 | -0.128   |
| Psychopathology   | 3.189                                      | 1.155 | 0.268**   | 5.627                                      | 1.119 | 0.472*** |
|                   | $\Delta R^2 = 0.068$ ( <i>p</i> = 0.007)   |       |           | $\Delta R^2 = 0.216$ ( <i>p</i> = 0.000)   |       |          |
| <b>Step 5</b>     |                                            |       |           |                                            |       |          |
| Constant          | 12.527                                     | 2.529 |           | 9.510                                      | 3.957 |          |
| Gender            | -3.118                                     | 1.033 | -0.308**  | -2.068                                     | 1.601 | -0.121   |
| Age               | -0.045                                     | 0.038 | -0.125    | 0.006                                      | 0.049 | 0.011    |
| Educational level | -0.317                                     | 0.104 | -0.324**  | -0.121                                     | 0.104 | -0.113   |
| Psychopathology   | 2.959                                      | 1.157 | 0.248*    | 5.329                                      | 1.135 | 0.447*** |
| Health Conditions | 1.416                                      | 0.952 | 0.148     | 3.507                                      | 2.586 | 0.129    |
|                   | $\Delta R^2 = 0.019$ ( <i>p</i> = 0.141)   |       |           | $\Delta R^2 = 0.016$ ( <i>p</i> = 0.179)   |       |          |

\* $p < 0.05$ ; \*\* $p < 0.01$ ; \*\*\*  $p < 0.001$
